# Supplementary material for: Engineering Enhanced Antimicrobial Properties in α-Conotoxin RgIA through D-Type Amino Acid Substitution and Incorporation of Lysine and Leucine Residues
Source: MDPI journal article supplement (doi:10.3390/molecules29051181), 2024-03-06
Supplement: s1 [file s1]

# Designing Antimicrobial Peptides Based on $\alpha$ -Conotoxin RgIA

Minghe Wang <sup>1</sup>, Zhouyuji Liao <sup>1</sup>, Dongting Zhangsun <sup>1,2</sup>, Yong Wu <sup>1,\*</sup> and Sulan Luo <sup>1,2,\*</sup>

<sup>1</sup> School of Medicine, Guangxi University, Nanning 530004, China; 13793337608@163.com (M.W.); 15170245109@163.com (Z.L.); zhangsundt@163.com (D.Z.)

<sup>2</sup> Key Laboratory of Tropical Biological Resources of Ministry of Education, Hainan University, Haikou 570228, China

\* Correspondence: wuyong@gxu.edu.cn (Y.W.); sulan2021@gxu.edu.cn (S.L.)

## LC-MS and HPLC analysis of peptides.

(a)

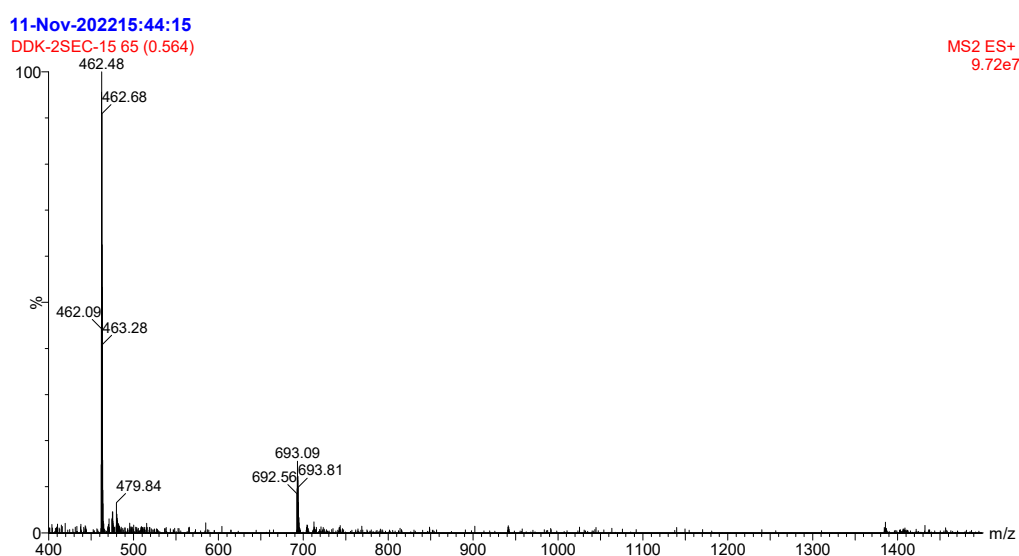

(b)

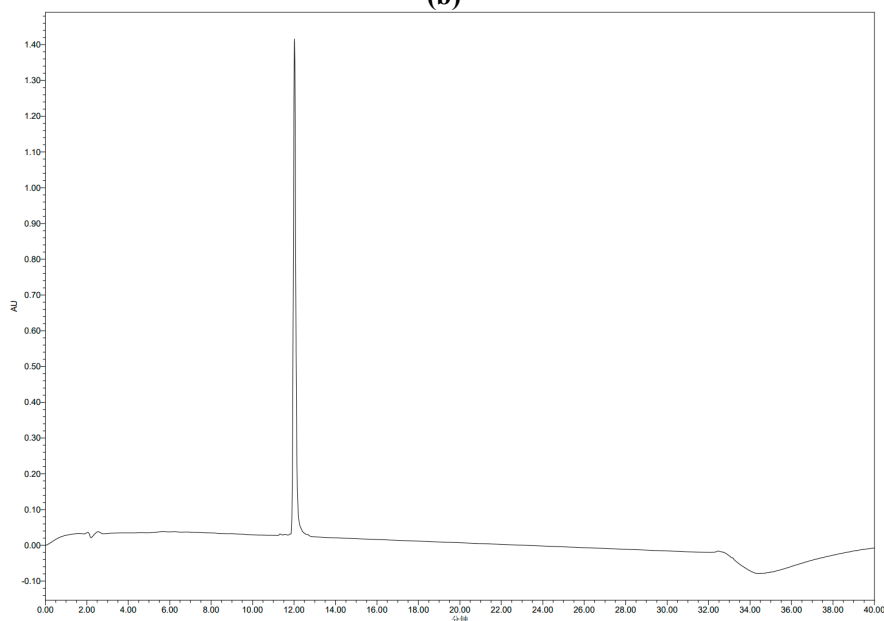

(c)

18-Dec-2023 19:41:00  
PEP220231218 50 (0.685)

Scan ES+  
6.05e7

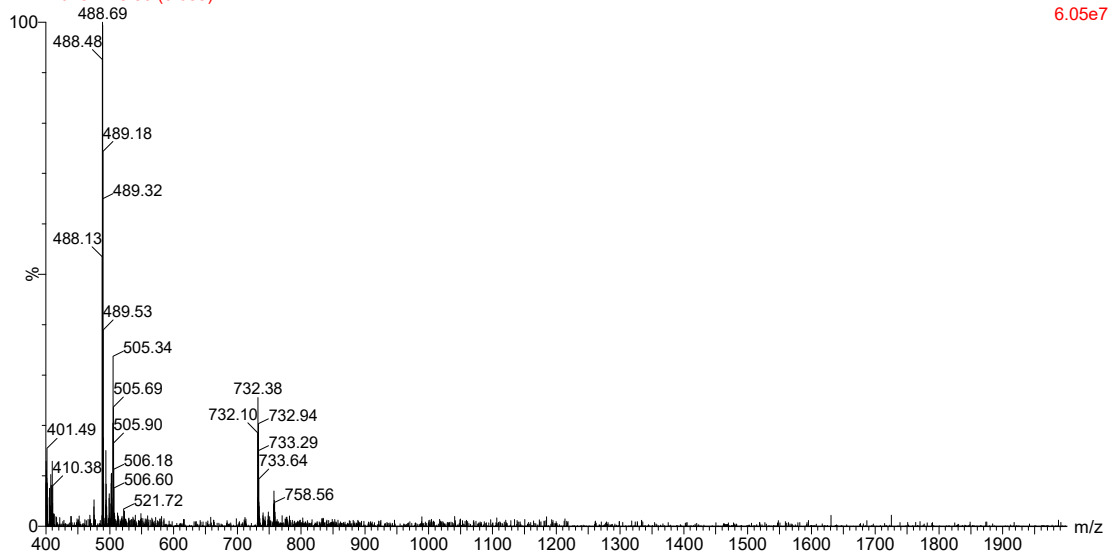

(d)

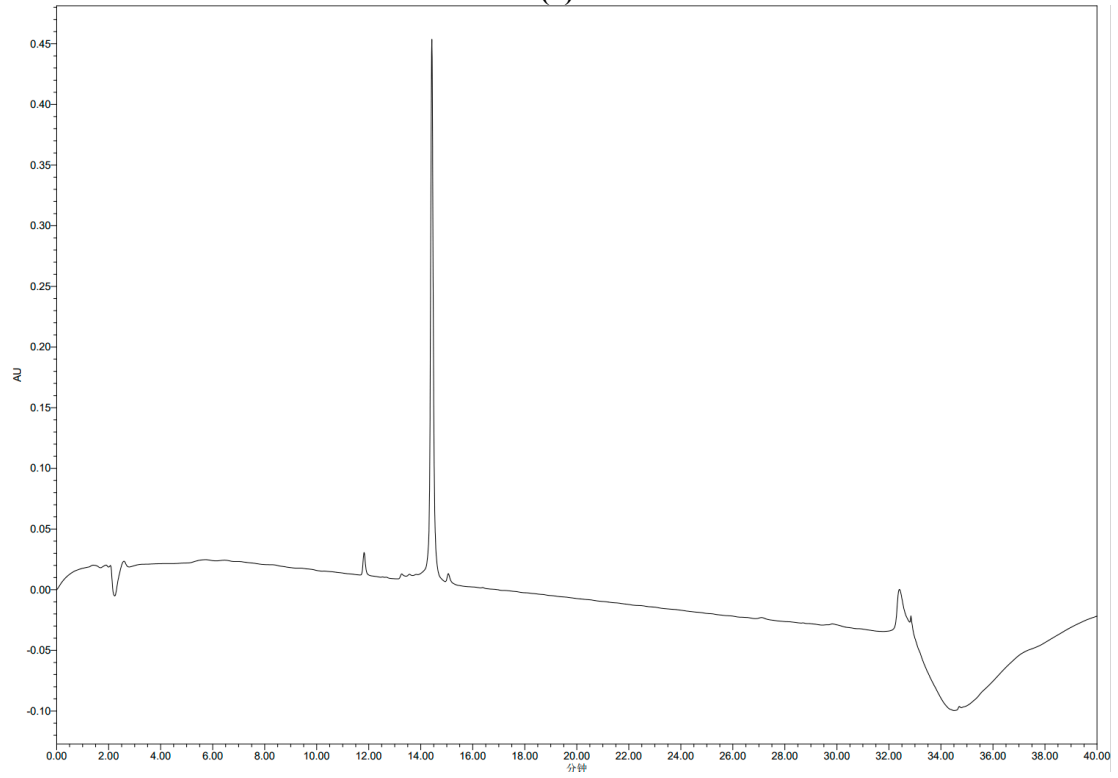

(e)

21-Sep-2022 14:52:31

DK5 sec4 198 (1.718)

MS2 ES+  
2.88e7

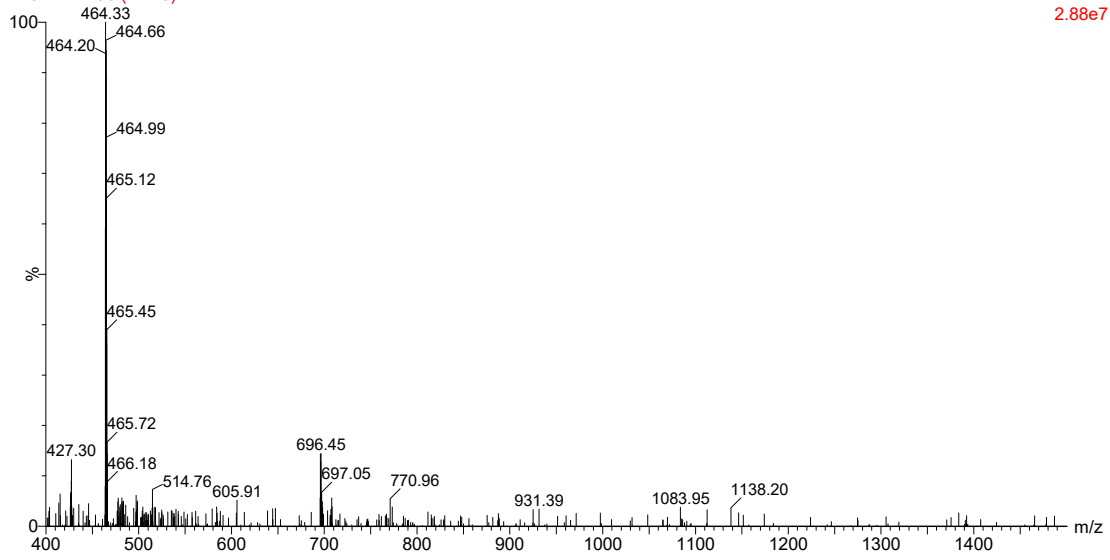

(f)

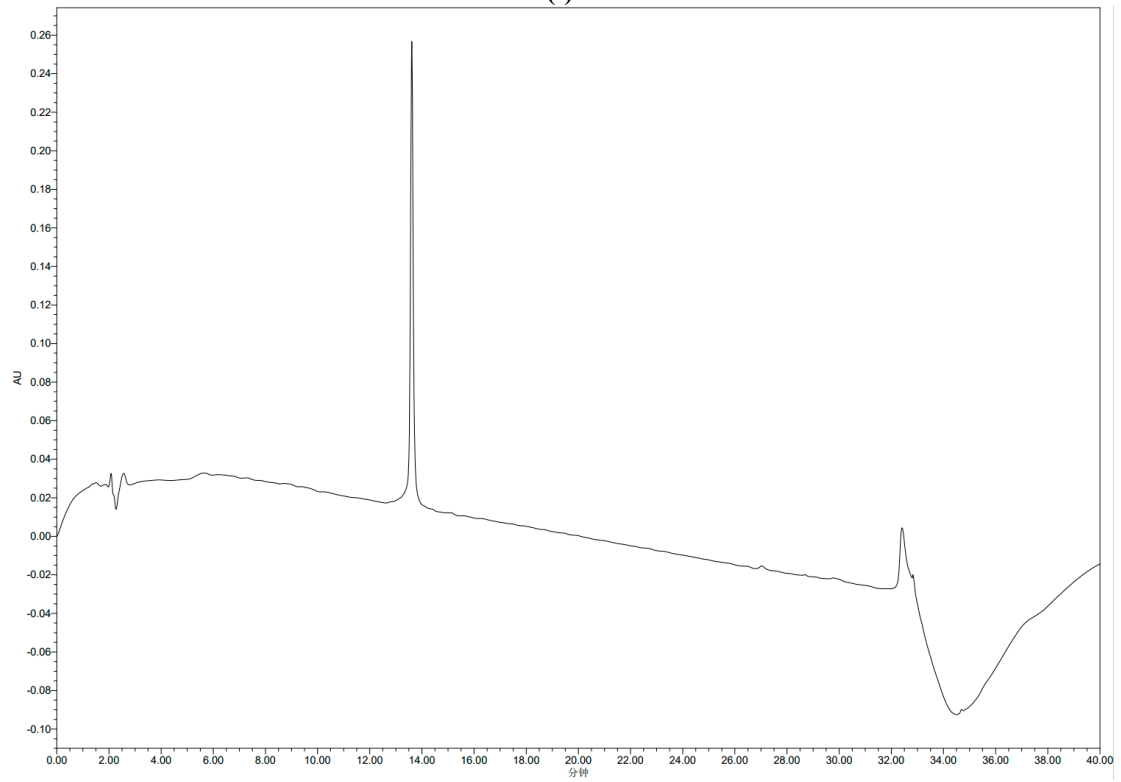

(g)

22-Sep-2022 11:33:32  
DK6 SEC-4 227 (1.970)

MS2 ES+  
1.05e8

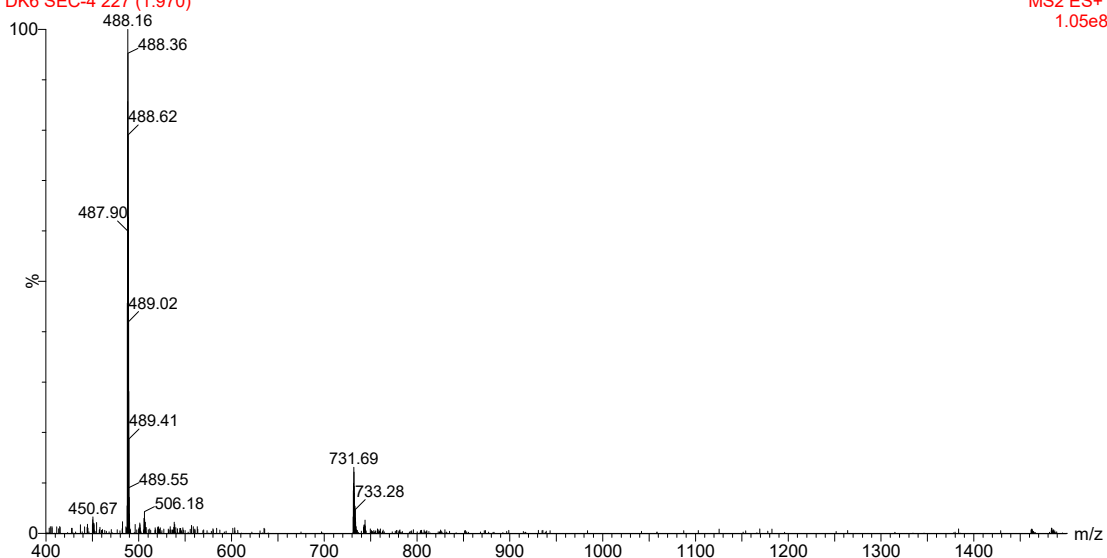

(h)

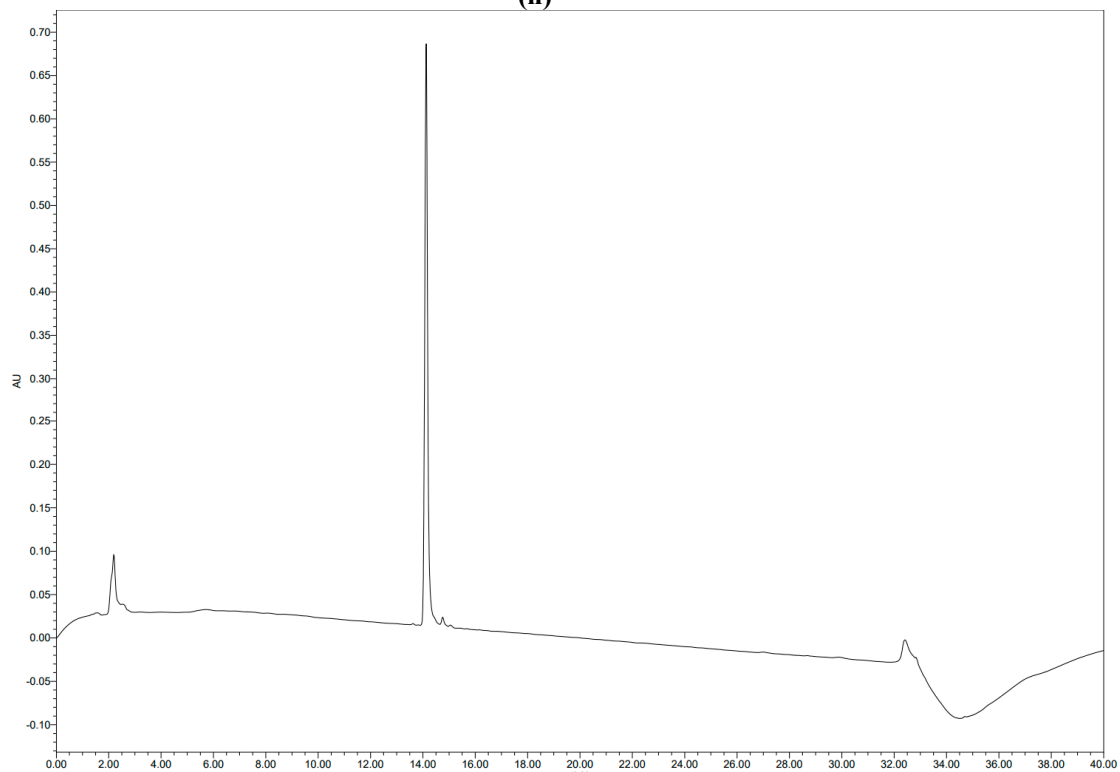

(i)

30-Mar-2023 22:19:23  
DK7SEC-4 280 (2.430)

MS2 ES+  
9.09e7

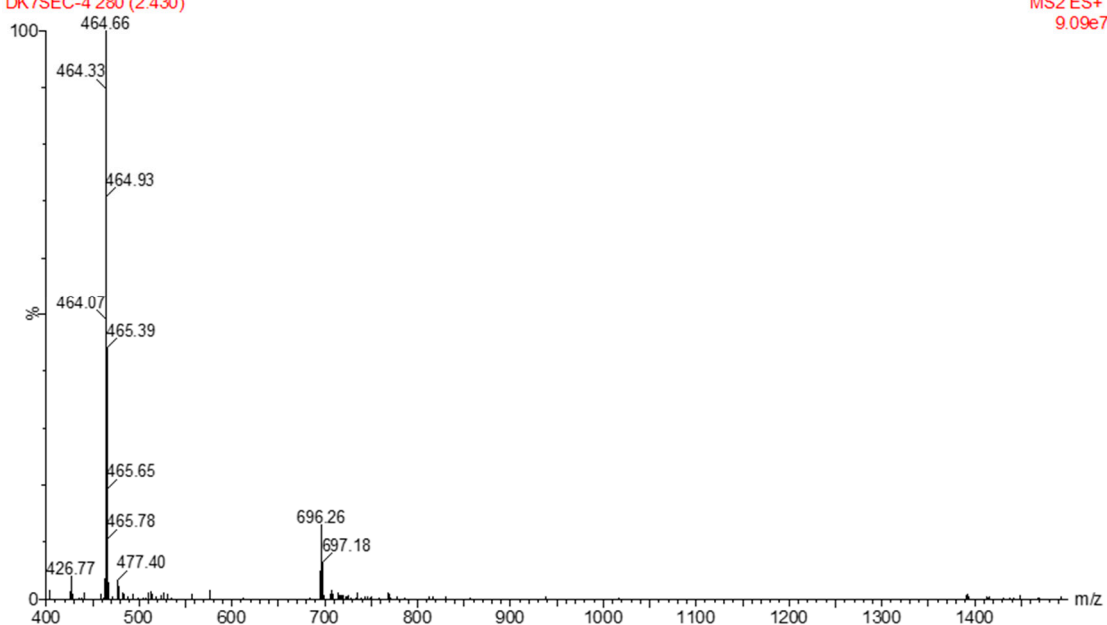

(j)

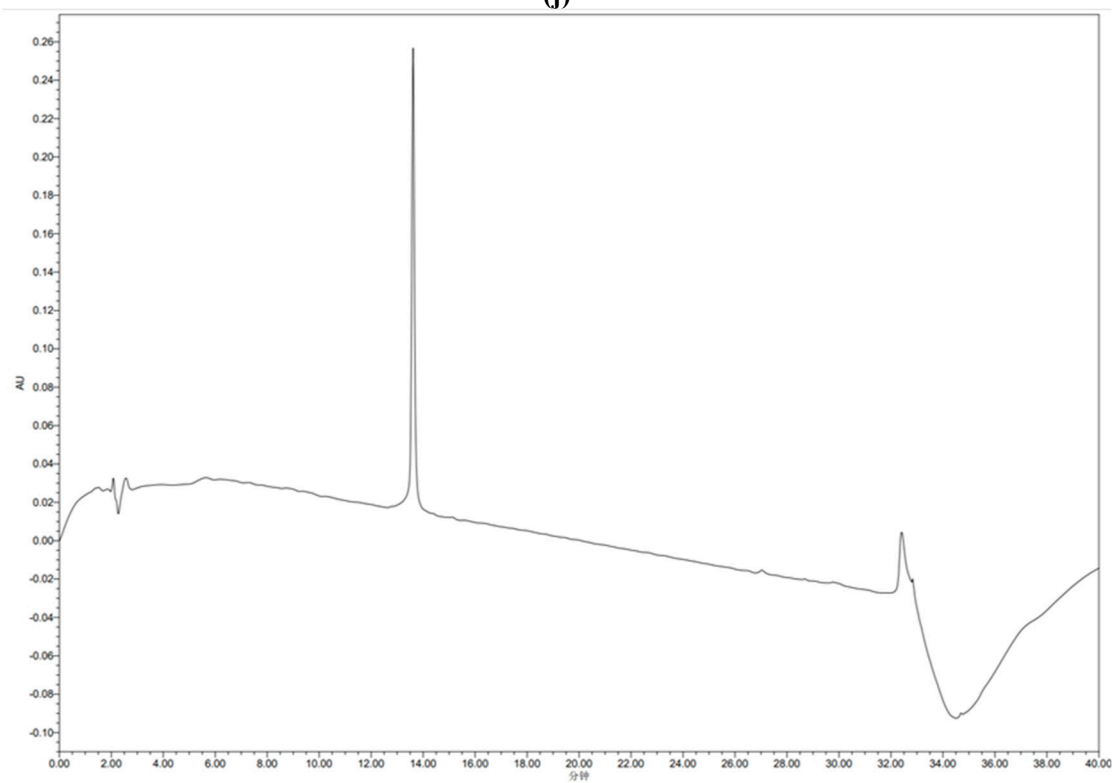

(k)

TX18-May-2023 15:58:54  
dk8lcms 38 (0.520) Cm (31:53)

Scan ES+  
1.22e7

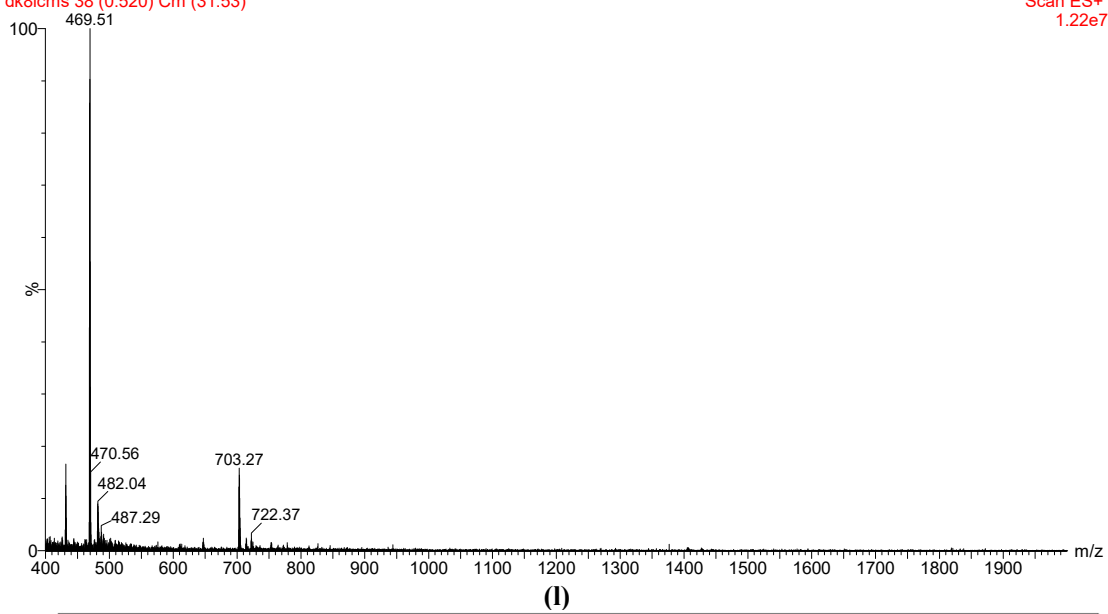

(l)

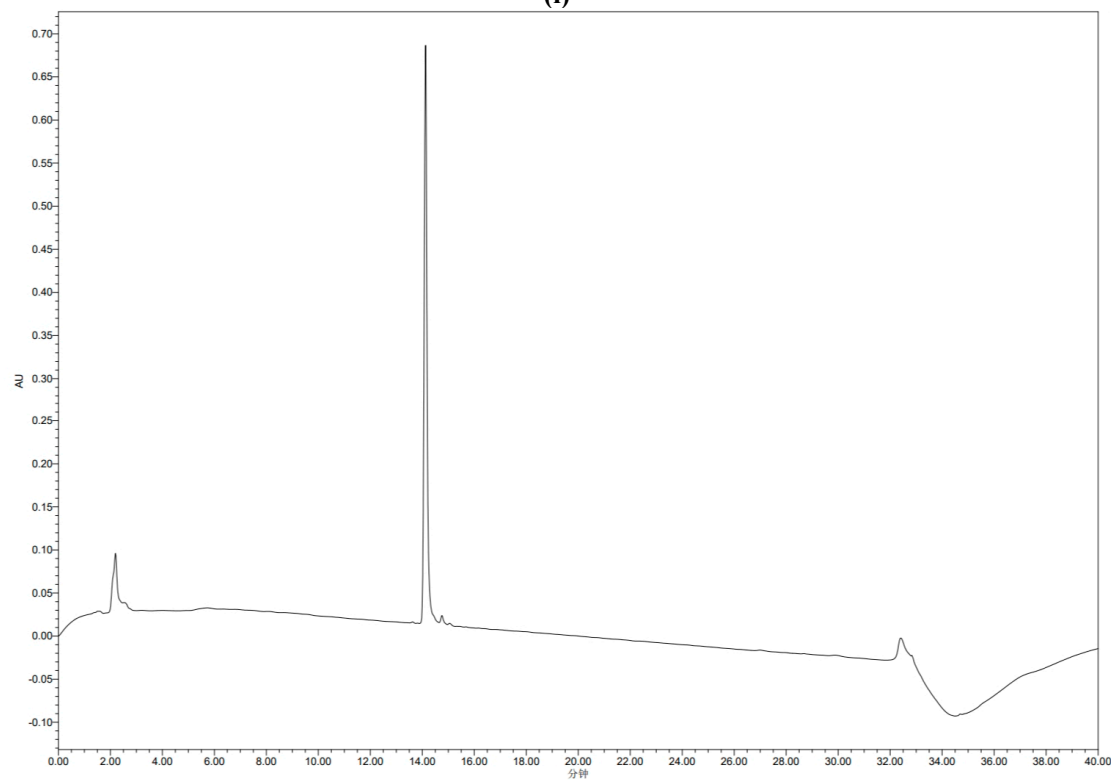

(m)

TX18-May-2023 16:06:44  
dk9lcms 39 (0.534) Cm (31:59)

Scan ES+  
1.73e7

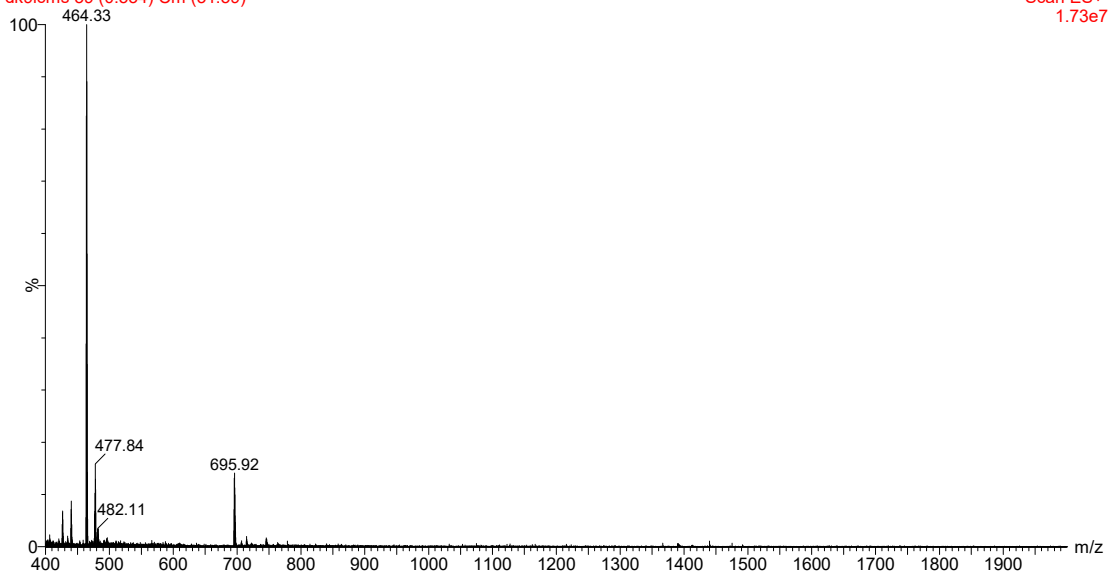

(n)

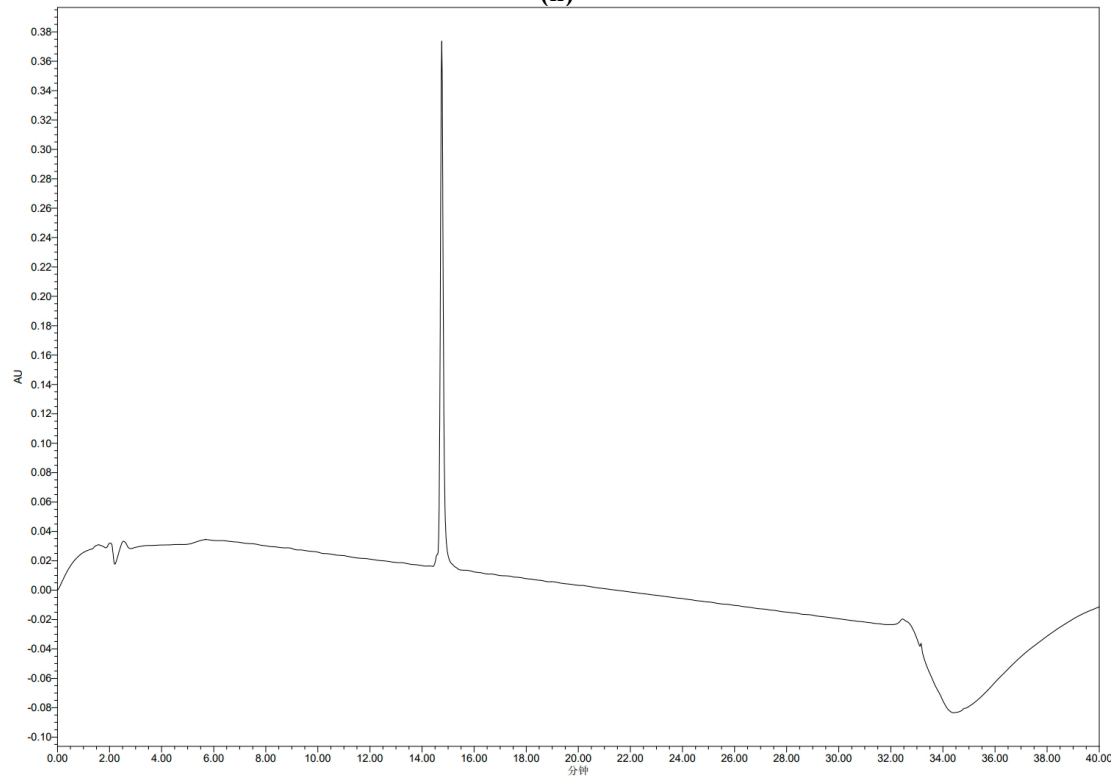

(o)

18-Mar-2023 16:32:12  
DK10SEC-5 316 (2.742)

MS2 ES+  
7.50e7

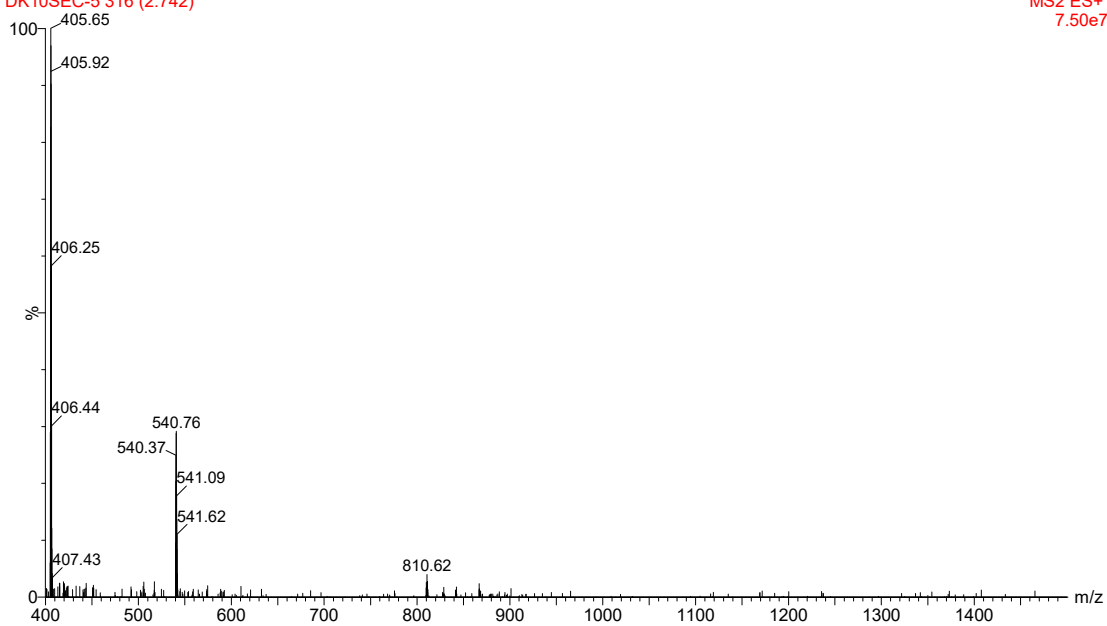

(p)

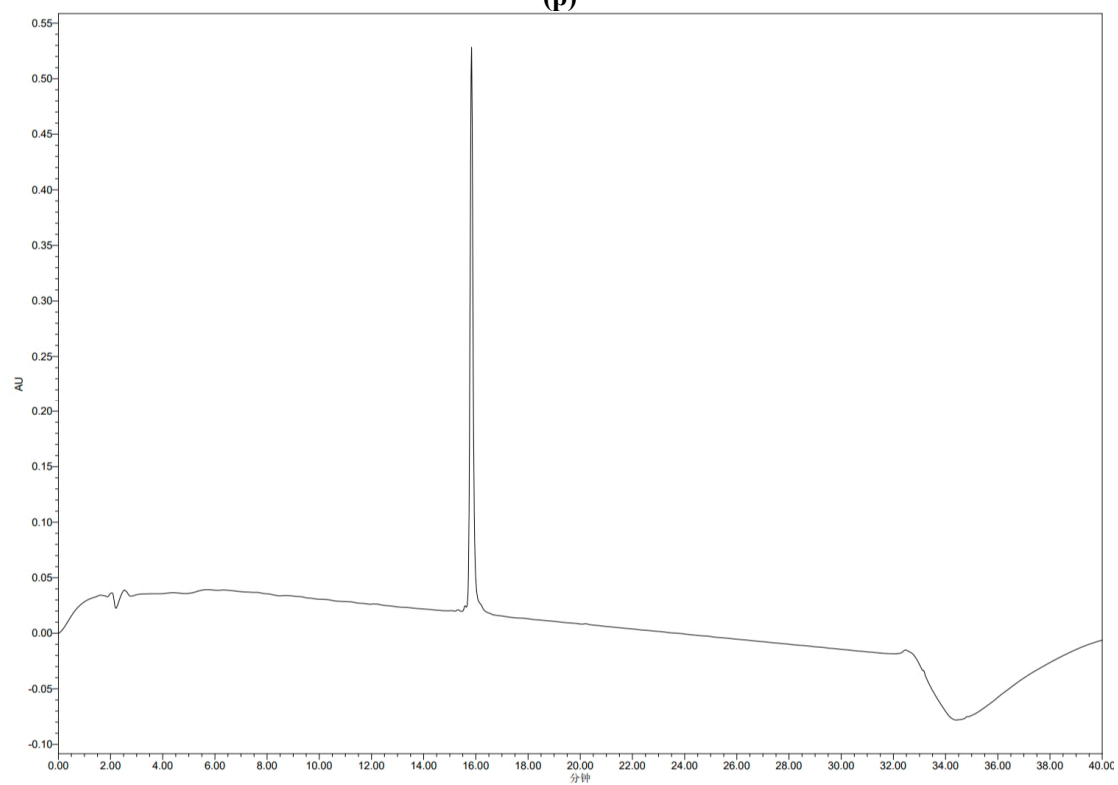



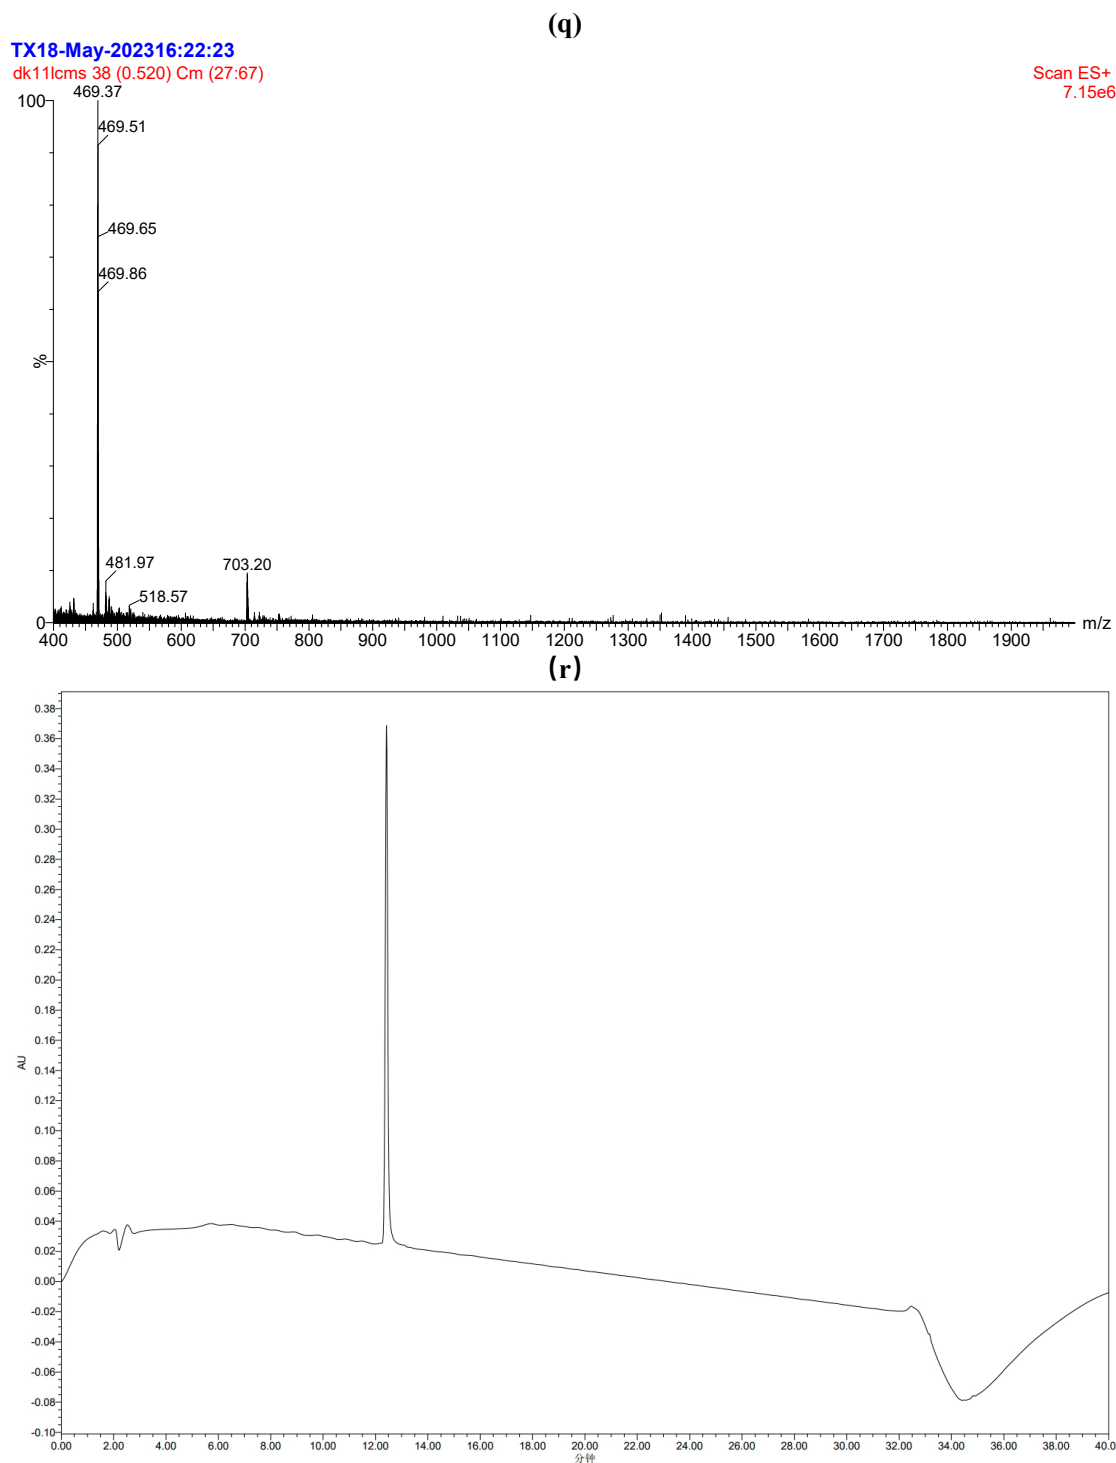

**Figure S1.** (a) LC-MS analysis of Pep 1. (b) HPLC analysis of the Pep 1. (c) LC-MS analysis of Pep 2. (d) HPLC analysis of the Pep 2. (e) LC-MS analysis of Pep 3. (f) HPLC analysis of the Pep 3. (g) LC-MS analysis of Pep 4. (h) HPLC analysis of the Pep 4. (i) LC-MS analysis of Pep 5. (j) HPLC analysis of the Pep 5. (k) LC-MS analysis of Pep 6. (l) HPLC analysis of the Pep 6. (m) LC-MS analysis of Pep 7. (n) HPLC analysis of the Pep 7. (o) LC-MS analysis of Pep 8. (p) HPLC analysis of the Pep 8. (q) LC-MS analysis of Pep 9. (r) HPLC analysis of the Pep 9.
